# Supplementary material for: An inferential framework for biological network hypothesis tests
Source: PubMed Central journal article supplement (PMC3621801; doi:10.1186/1471-2105-14-94), 2013-03-14

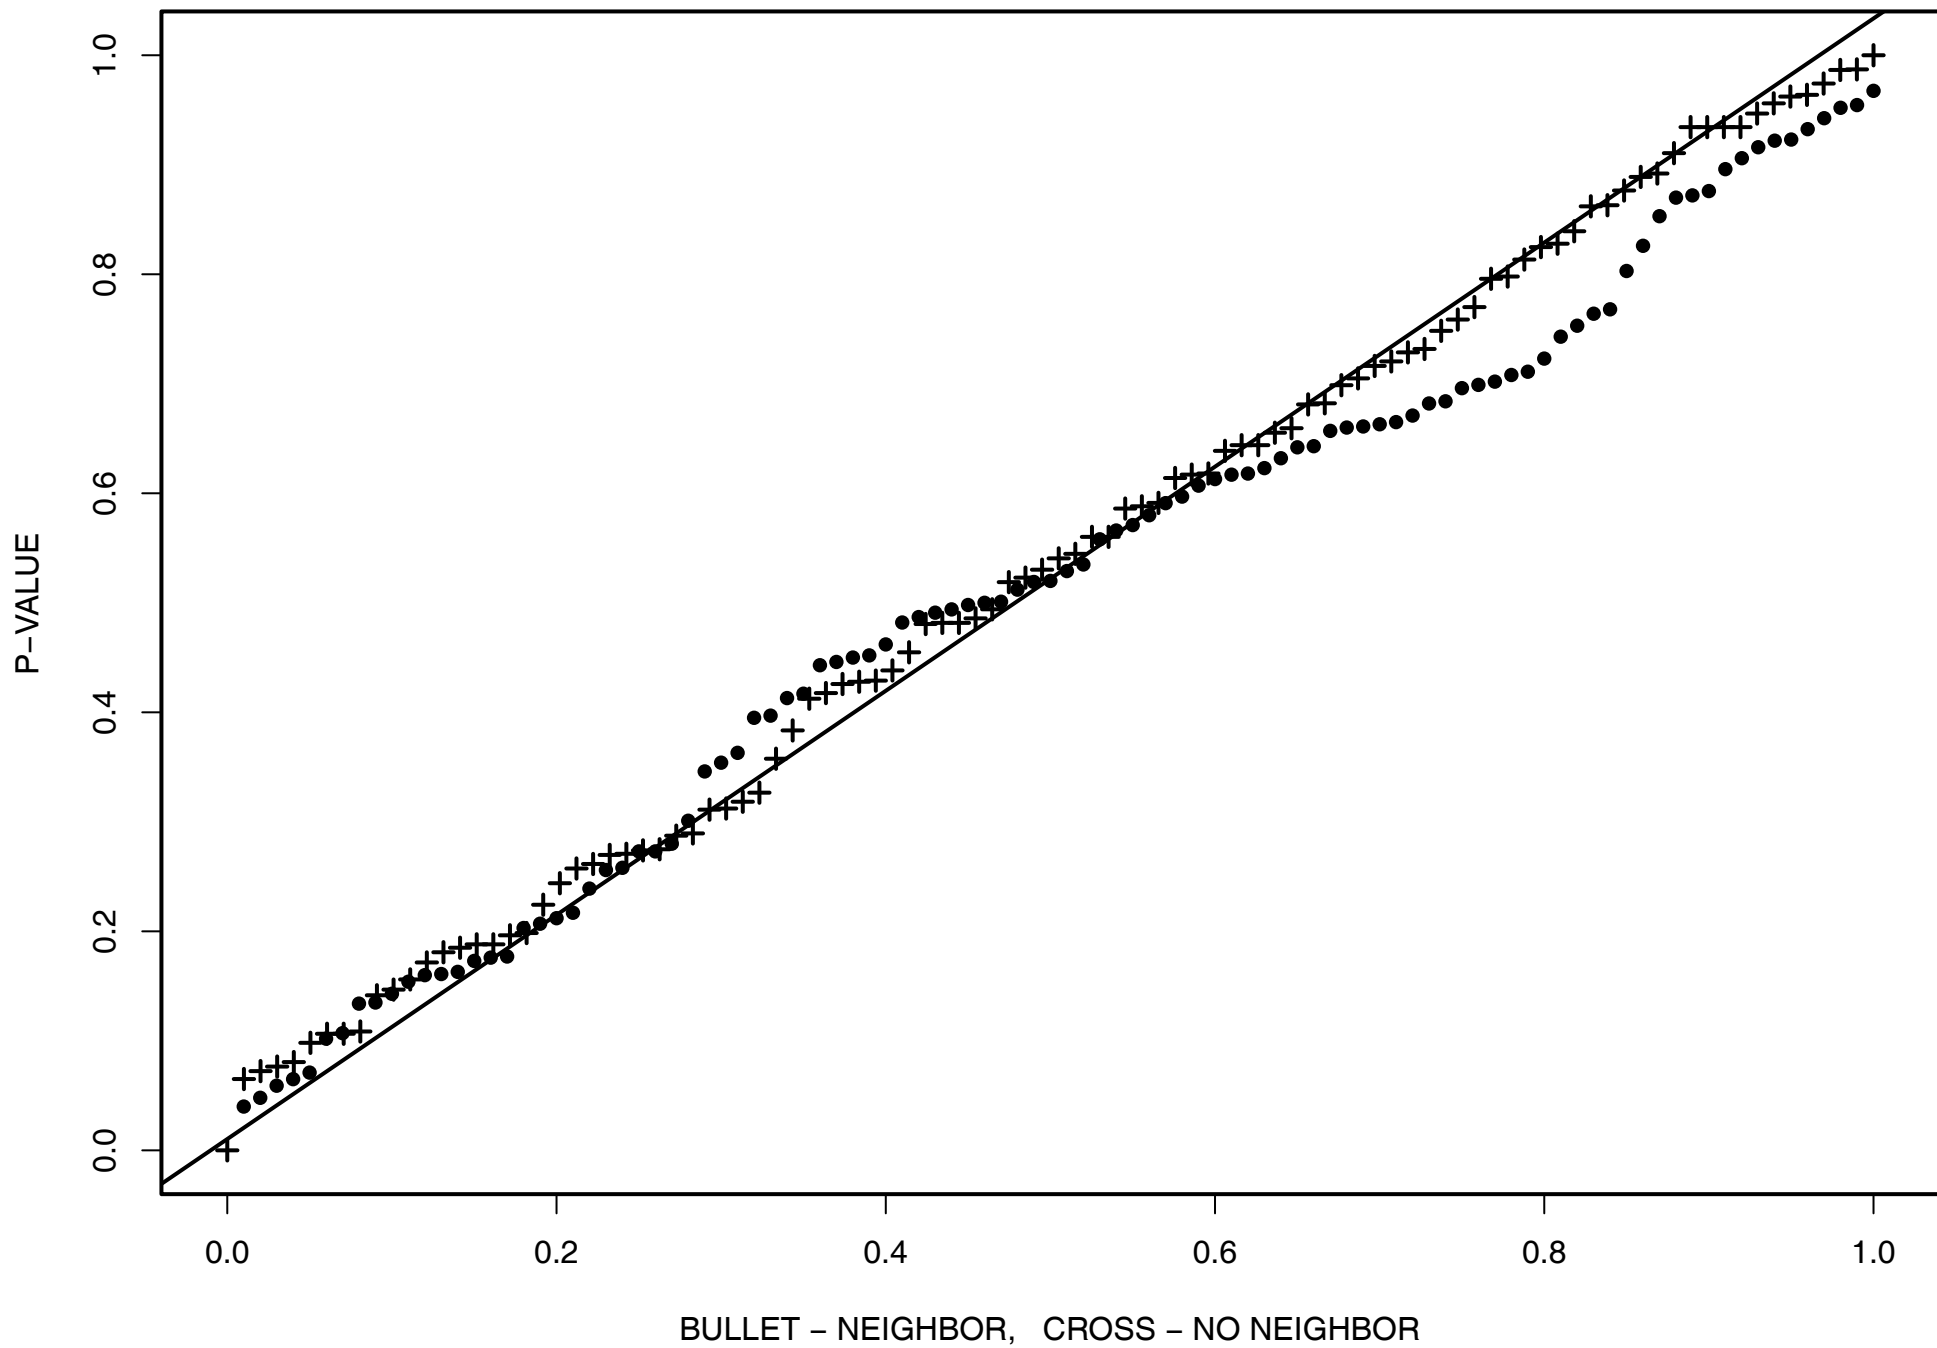

Supplement: 1471-2105-14-94-S3.pdf [file 1471-2105-14-94-S3.pdf]
